# Supplementary material
Source: HighWire-hosted journal article supplement (https://www.cmajopen.ca/highwire/filestream/80992/field_highwire_adjunct_files/0/open-2016-0108-original-submission.pdf)
Supplement: open-2016-0108-original-submission.pdf [file open-2016-0108-original-submission.pdf]

# A simulation study of patient-borne water and electrical costs in home hemodialysis: Off-loading the expense onto patients

Matthew Nickel, BEng<sup>1</sup>; Wes Rideout<sup>2</sup>, Nikhil Shah, MD<sup>3</sup>; Frances Reintjes, RN<sup>2</sup>, Justin Z Chen, MD<sup>4</sup>; Robert Burrell, PhD<sup>1</sup>; Robert P Pauly, MD<sup>2,3</sup>

<sup>1</sup> Department of Chemical and Materials Engineering, University of Alberta, Edmonton, AB, Canada

<sup>2</sup> Northern Alberta Renal Program, Alberta Health Services, Edmonton, AB, Canada

<sup>3</sup> Division of Nephrology, Department of Medicine, University of Alberta, Edmonton, AB,

<sup>4</sup> Department of Medicine, University of Alberta, Edmonton, AB, Canada  
Canada

## WORD COUNT:

Abstract: 248

Main text: 1853

## RUNNING TITLE:

Water and electricity cost of HHD

## FUNDING STATEMENT:

The project was self-funded by the investigators

## CORRESPONDING AUTHOR:

Robert P. Pauly, MD, MSc, FRCPC

Associate Professor of Medicine,

Division of Nephrology

11-107 Clinical Sciences

Edmonton, Alberta, Canada

T6G 2G3

1-780-407-3218

[Robert.pauly@ualberta.ca](mailto:Robert.pauly@ualberta.ca)

## Abstract

**Background:** There is increasing interest in the use of home hemodialysis (HHD) as an alternative renal replacement therapy to facility-based conventional hemodialysis. HHD can result in better physiological parameters, quality of life, and overall survival for patients with end stage renal disease (ESRD). While HHD is associated with lower costs to the healthcare system due to lower staffing and overhead costs, it transfers the treatment cost of utilities (water and power) to the patient. The purpose of this study was to determine the utility costs of HHD and create a model such that patients and renal programs can predict the annual patient-borne dialysis utility costs involved with this type of treatment. **Methods:** Seven common combinations of treatment duration and dialysate flows were replicated 5 times using various combinations of HHD and reverse osmosis machines. Real time electrical and water consumption was monitored during these dialysis simulations. **Results:** Using typical 2014 utility costs for Edmonton, Alberta, the most expensive prescription was for nocturnal HHD (8 hours, 6 days/week; Qd 300mL/min), which resulted in a utility cost of \$1263/year, while the least expensive prescription was for conventional HHD (4 hours, 3 days/week; Qd 500mL/min) costing \$422/year. A generic formula is presented to allow patients/programs to calculate a more precise estimate of utility costs based on individual combinations of dialysis intensity, frequency and utility costs unique to any individual patient. **Interpretation:** We demonstrate a significant cost burden of hemodialysis is transferred to the patient on HHD, which would otherwise be borne by the renal program.

1  
2  
3  
4  
5  
6  
7  
8  
9  
10  
11  
12  
13  
14  
15  
16  
17  
18  
19  
20  
21  
22  
23  
24  
25  
26  
27  
28  
29  
30  
31  
32  
33  
34  
35  
36  
37  
38  
39  
40  
41  
42  
43  
44  
45  
46  
47  
48  
49  
50  
51  
52  
53  
54  
55  
56  
57  
58  
59  
60

1 **KEY WORDS:**

2 Home hemodialysis, water, electricity, utilities, cost, economics, expenses

3

4

Confidential

## 1 Introduction

2  
3  
4  
5  
6  
7  
8  
9  
10  
11  
12  
13  
14  
15  
16  
17  
18  
19  
20  
21  
22  
23  
24  
25  
26  
27  
28  
29  
30  
31  
32  
33  
34  
35  
36  
37  
38  
39  
40  
41  
42  
43  
44  
45  
46  
47  
48  
49  
50  
51  
52  
53  
54  
55  
56  
57  
58  
59  
60

1  
2  
3  
4  
5  
6  
7  
8  
9  
10  
11  
12  
13  
14  
15  
16  
17  
18  
19  
20  
21  
22  
23  
24  
25  
26  
27  
28  
29  
30  
31  
32  
33  
34  
35  
36  
37  
38  
39  
40  
41  
42  
43  
44  
45  
46  
47  
48  
49  
50  
51  
52  
53  
54  
55  
56  
57  
58  
59  
60

Conventional intermittent in-centre hemodialysis is the most utilized modality of renal replacement therapy in North America. However, there is increasing interest in the usage of alternative strategies such as peritoneal dialysis and home hemodialysis (HHD). HHD is recognized as resulting in better quality of life, indices of mineral metabolism, cardiac health and even overall survival compared to conventional in-centre hemodialysis<sup>1-5</sup>. This modality also results in cost savings to the healthcare system when compared to in-centre intermittent hemodialysis<sup>6-8</sup>. Previously published analyses have looked at the costs of providing this therapy from the payer perspective. Although there is considerable variability in analytic approaches and their results, it is generally accepted that HHD is associated with lower human resource and facility management expenditures [2,5,7]. However, when patients self-dialyze at home, some expenses (such as utility costs of running the dialysis equipment) are transferred to the patient, and to date, no one has attempted to explicitly delineate these patient-borne costs. The aim of this study was to measure utility consumption (water and electrical) required to perform various prescriptions of HHD, and estimate the associated expenditure.

## 19 Methods

20  
21  
22  
23  
24  
25  
26  
27  
28  
29  
30  
31  
32  
33  
34  
35  
36  
37  
38  
39  
40  
41  
42  
43  
44  
45  
46  
47  
48  
49  
50  
51  
52  
53  
54  
55  
56  
57  
58  
59  
60

This study was conducted in the HHD program of the Northern Alberta Renal Program in Edmonton, Canada. We performed simulations of 7 different home dialysis prescriptions

1  
2  
3 1 (ie. 7 combinations of dialysis treatment duration and dialysate flow – Qd): 6 hours at 300  
4  
5 2 ml/min, 8 hours at 300 ml/min, 4 hours at 500 ml/min, 6 hours at 500 ml/min, 2 hours at  
6  
7 3 800 ml/min, 3 hours at 800 ml/min and 4 hours at 800 ml/min. For each prescription we  
8  
9 4 performed a set of five repeats using five different combinations of five hemodialysis  
10  
11 5 machines (Bellco Formula Domus; Bellco Canada, Mississauga, Canada) and five reverse  
12  
13 6 osmosis (RO) machines (Gambro WRO 300; Gambro Canada, Richmond Hill, Canada). Each  
14  
15 7 set was conducted at 20 °C. An additional simulation of each prescription using a single  
16  
17 8 combination of hemodialysis machine and RO machine was conducted at 8 °C to simulate a  
18  
19 9 cold water source requiring additional pre-heating by the hemodialysis machine prior to  
20  
21 10 generating dialysate. All simulations included a 60-minute pre-treatment period during  
22  
23 11 which the hemodialysis and RO machines undergo automated system checks, as well as an  
24  
25 12 approximately 45 minute post-treatment heat disinfection cycle. Additional tests were  
26  
27 13 conducted to simulate the chemical disinfection procedure performed on a hemodialysis  
28  
29 14 machine in the home (which our program prescribes after every three treatments) and on  
30  
31 15 the RO machine (which our program prescribes once weekly).  
32  
33  
34  
35  
36  
37  
38  
39  
40  
41

42 17 Water consumption was measured using a Seametrics FT400-SERIES in-line flow meter  
43  
44 18 proximal to the RO machine, with Seametrics DL76 Data Logger (Seametrics Inc., Kent,  
45  
46 19 USA); data was analyzed using FlowInspector™ Version 2 software provided by Seametrics.  
47  
48 20 Power consumption was measured using a Kill A Watt P4400 electricity usage monitor (P3  
49  
50 21 International, New York, USA) for each of the RO and dialysis machines.  
51  
52  
53  
54  
55  
56  
57  
58  
59  
60

1  
2  
3 1 The cost of water and electricity was calculated using local utility cost estimates in  
4  
5  
6 2 Edmonton, Alberta using average 2014 rates from one of multiple available water and  
7  
8 3 electricity providers in Alberta. Data are presented in 2014 Canadian dollars. The costing  
9  
10 4 of utilities also assumed a fixed rate monthly cost for both water and electricity which may  
11  
12 5 be less accurate in jurisdictions where utility rates are variable depending on consumption  
13  
14 6 (eg. the rate is different for the first  $x$  cubic meters of water and changes to a different rate  
15  
16 7 for the next  $y$  cubic meters of water).  
17  
18  
19  
20  
21 8

22 9 A monthly generic formula for the cost of performing hemodialysis was calculated as  
23  
24 10 follows:  
25  
26  
27  
28 11

29  
30 12 *Formula 1*

$$\text{Cost of Dialysis} = n(U_w C_w + U_p C_p)$$

31  
32  
33  
34 13  
35  
36  
37 14 where  $n$  is the number of dialysis treatments per month,  $U_w$  and  $U_p$  are the mean water and  
38  
39 15 electrical power usage respectively per treatment for a given prescription, and  $C_w$  and  $C_p$   
40  
41 16 are the cost of water and electrical power per treatment.  $U_w$  and  $U_p$  are reported in litres  
42  
43 17 (L) and kilowatt-hours (kWh) respectively, while  $C_w$  and  $C_p$  are quoted in dollars per L and  
44  
45 18 dollars per kWh respectively.  
46  
47  
48  
49  
50 19

51  
52 20 The total monthly utility cost of HHD must also include the expense of the chemical  
53  
54 21 disinfecting cycle of the dialysis and RO machines. The monthly frequency of these  
55  
56 22 disinfection cycles is also variable and estimated as follows:  
57  
58  
59  
60



1  
2  
3 1 or water discarded during the pre- and post-treatment phases of system checks and heat  
4  
5  
6 2 disinfection.  
7  
8  
9 3

10 4 All simulated dialysis prescriptions were conducted at 20 °C to approximate ambient water  
11  
12  
13 5 temperature entering the hemodialysis machine from the RO machine. However, using the  
14  
15  
16 6 same combination of dialysis and RO machines we conducted single simulations of all 7  
17  
18 7 prescriptions with a source water temperature of 8 °C to approximate a water source that  
19  
20  
21 8 would need significant pre-heating prior to generating dialysate. Under such conditions,  
22  
23 9 the amount of water consumption remained unchanged ( $-1 \pm 2\%$ ), but the electrical power  
24  
25 10 consumption per treatment increased by  $34 \pm 10\%$ .  
26  
27  
28 11

29  
30 12 Patients self-dialyzing at home are taught to chemically disinfect both the hemodialysis and  
31  
32 13 the RO machines. The protocols for these procedures are independent of dialysis  
33  
34 14 prescription. Water consumption for the chemical disinfection cycle of the hemodialysis  
35  
36 15 and RO machines was  $110.6 \pm 6.2$  L (n=5) and  $67.6 \pm 2.0$  L (n=4) respectively. Electricity  
37  
38 16 consumption was  $0.56 \pm 0.07$  kWh and  $0.15 \pm 0.01$  kWh for hemodialysis and RO machines  
39  
40 17 respectively. Using these results as constants in Formula 2, the total cost of disinfection  
41  
42 18 using the Bellco/Gambro HHD ensemble can be re-written as:  
43  
44  
45  
46  
47 19

48  
49 **Formula 3**  
50

$$51 \text{ Cost of Disinfection} = [n_d(110.6C_w + 0.56C_p)] + [n_r(67.6C_w + 0.15C_p)]$$

52  
53  
54 21  
55  
56  
57  
58  
59  
60

1  
2  
3 1 Note, the electricity consumed for the hemodialysis chemical disinfection when source  
4  
5 2 water was 8 °C was 50% more than when water entering the hemodialysis was 20 °C; this  
6  
7 3 has not been considered in Formula 3. Combining Formula 1 and Formula 3 allows one to  
8  
9 4 calculate the total monthly and annual out-of-pocket cost borne by patients performing  
10  
11 5 HHD. Table 2 summarizes these expenses for 4 common dialysis prescriptions: (a) 8 hours  
12  
13 6 at 300 ml/min with 6 treatments per week, (b) 8 hours at 300 ml/min with treatments  
14  
15 7 every other night, (c) 2 hour at 800 ml/min with 6 treatments per week, and (d) 4 hours at  
16  
17 8 500 ml/min with 3 treatments per week. Treatment frequencies were determined on the  
18  
19 9 basis of a 31-day month. The greatest expense is associated with a frequent nocturnal  
20  
21 10 hemodialysis prescription (ie. \$1263.27) while the least expense is incurred by a more  
22  
23 11 conventional thrice-weekly hemodialysis prescription (\$422.12).  
24  
25  
26  
27  
28  
29  
30  
31

## 32 **Interpretation**

33  
34  
35  
36  
37  
38  
39  
40  
41  
42  
43  
44  
45  
46  
47  
48  
49  
50  
51  
52  
53  
54  
55  
56  
57  
58  
59  
60

12 **Interpretation**  
13  
14 While a number of economic analyses have been published for HHD, all take the  
15 perspective of the health system and ignore expenses incurred by the patient<sup>6, 8-14</sup>. To our  
16 knowledge, this is the first study to systematically estimate patient-borne water and  
17 electricity costs when patients perform HHD independently at home. The annual utility cost  
18 of HHD in this study range from \$422 to \$1263 and, not surprisingly, the most expensive  
19 form of dialysis is a prescription used for 8-hour six-times-weekly nocturnal home  
20 hemodialysis and the least expensive is for a prescription of conventional 4-hour thrice-  
21 weekly hemodialysis.  
22

1  
2  
3 1 Because patients performing HHD would otherwise be dialyzing in facility-based dialysis  
4  
5 2 units where the utility costs would be absorbed by the renal programs, this  
6  
7  
8 3 disadvantageous transfer of cost to the patient is a boon to renal care providers who  
9  
10 4 benefit doubly because they also save on the staffing costs to treat HHD patients in-centre.  
11  
12  
13 5 To some extent, the patient-incurred expense of paying for water and power for HHD is  
14  
15 6 offset by being spared the time and expense associated with travel to and from facility-  
16  
17  
18 7 based hemodialysis on three days a week. However, especially for patients whose travel  
19  
20 8 costs are minimal the imbalance between savings (eg. from bus, taxi, parking, vehicle  
21  
22 9 depreciation, etc.) versus the expenses (eg. water and electricity costs) raises the question  
23  
24  
25 10 of equity among dialysis patients. In fact, several jurisdictions in Canada have recently  
26  
27 11 proposed reimbursing patients for their monthly utility expenses. Others provide patients  
28  
29 12 with letters they can submit with their income tax documents to claim the utility expense  
30  
31 13 as a health care related medical deduction <sup>15</sup>. In some cases, the treatment-associated  
32  
33 14 expense of HHD may even be a legitimate barrier to the uptake of HHD, especially for those  
34  
35 15 patients on a fixed income. Indeed, some jurisdictions (most notably the state of Victoria,  
36  
37 16 Australia) already provide an annual cash payment to patients to incentivize HHD and  
38  
39 17 offset precisely the sort of expenses such as additional utility costs.  
40  
41  
42  
43  
44 18  
45  
46  
47 19 Perhaps a surprising and underappreciated result of these simulations is the recognition  
48  
49 20 that only between 13% and 26% of water consumed during the hemodialysis treatment  
50  
51 21 results in dialysate, while the rest is wastewater that is routinely discarded. Others have  
52  
53 22 proposed to recycle this wastewater for other non-potable purposes such as flushing toilets  
54  
55 23 or watering gardens <sup>16</sup>.

1  
2  
3 1  
4  
5  
6 2 Because the scope of this study was exclusively to estimate the cost of water and power,  
7  
8 3 patient-borne costs associated with training for HHD (which may include room and board  
9  
10 4 expenses or lost income while a person is training at a centre remote from home) are not  
11  
12 5 included. Thus the overall financial burden on patients initiating and maintaining  
13  
14 6 themselves on HHD is much greater than is estimated simply by measuring the utility  
15  
16 7 expenses. But even if considering simply the cost of water, the estimates presented here do  
17  
18 8 not include the additional equipment needed for water purification when the source water  
19  
20 9 is from a well, or water delivery and storage costs when water must be trucked on location  
21  
22 10 and stored in a cistern (as may be the case for rural dwellers who have no suitable well  
23  
24 11 water). An additional limitation to the present study is the unknown generalizability of the  
25  
26 12 simulations presented here to other HHD and RO machines not manufactured by the  
27  
28 13 vendors currently in use in our renal program. While the Bellco/Gambro combination is  
29  
30 14 relatively common among Canadian HHD programs, these are not used exclusively; the  
31  
32 15 variation on water and power consumption with other dialysis equipment is assumed to be  
33  
34 16 similar though not known with any degree of certainty.  
35  
36  
37  
38  
39  
40  
41  
42 17

43  
44 18 In summary, we present per treatment, monthly and annual estimates of patient-borne  
45  
46 19 water and electrical power costs based on simulations of commonly prescribed HHD  
47  
48 20 prescriptions. Because these expenses are transferred to the patient, the current study  
49  
50 21 addresses a much-overlooked perspective among in the economics of HHD delivery.  
51  
52  
53  
54 22  
55 23  
56  
57  
58  
59  
60

1  
2  
3  
4  
5  
6  
7  
8  
9  
10  
11  
12  
13  
14  
15  
16  
17  
18  
19  
20  
21  
22  
23  
24  
25  
26  
27  
28  
29  
30  
31  
32  
33  
34  
35  
36  
37  
38  
39  
40  
41  
42  
43  
44  
45  
46  
47  
48  
49  
50  
51  
52  
53  
54  
55  
56  
57  
58  
59  
60

1 **Disclosures**

2

3 None

4

Confidential

## References

1. Pauly RP, Chan CT: Reversing the risk factor paradox: is daily nocturnal hemodialysis the solution? *Seminars In Dialysis*, 20: 539-543, 2007
2. Nesrallah GE, Lindsay RM, Cuerden MS, Garg AX, Port F, Austin PC, Moist LM, Pierratos A, Chan CT, Zimmerman D, Lockridge RS, Couchoud C, Chazot C, Ofsthun N, Levin A, Copland M, Courtney M, Steele A, McFarlane PA, Geary DF, Pauly RP, Komenda P, Suri RS: Intensive hemodialysis associates with improved survival compared with conventional hemodialysis. *Journal of the American Society of Nephrology : JASN*, 23: 696-705, 2012
3. Walsh M, Culeton B, Tonelli M, Manns B: A systematic review of the effect of nocturnal hemodialysis on blood pressure, left ventricular hypertrophy, anemia, mineral metabolism, and health-related quality of life. *Kidney Int*, 67: 1500-1508, 2005
4. Suri RS, Nesrallah GE, Mainra R, Garg AX, Lindsay RM, Greene T, Daugirdas JT: Daily hemodialysis: a systematic review. *Clin J Am Soc Nephrol*, 1: 33-42, 2006
5. Weinhandl ED, Liu J, Gilbertson DT, Arneson TJ, Collins AJ: Survival in daily home hemodialysis and matched thrice-weekly in-center hemodialysis patients. *J Am Soc Nephrol*, 23: 895-904, 2012
6. McFarlane PA, Pierratos A, Redelmeier DA: Cost savings of home nocturnal versus conventional in-center hemodialysis. *Kidney Int*, 62: 2216-2222, 2002
7. Komenda P, Gavaghan MB, Garfield SS, Poret AW, Sood MM: An economic assessment model for in-center, conventional home, and more frequent home hemodialysis. *Kidney Int*, 81: 307-313, 2012
8. Klarenbach S, Tonelli M, Pauly R, Walsh M, Culeton B, So H, Hemmelgarn B, Manns B: Economic evaluation of frequent home nocturnal hemodialysis based on a randomized controlled trial. *J Am Soc Nephrol*, 25: 587-594, 2014
9. Kroeker A, Clark WF, Heidenheim AP, Kuenzig L, Leitch R, Meyette M, Muirhead N, Ryan H, Welch R, White S, Lindsay RM: An operating cost comparison between conventional and home quotidian hemodialysis. *Am J Kidney Dis*, 42: 49-55, 2003

- 1  
2  
3  
4 1 10. Komenda P, Copland M, Makwana J, Djurdjev O, Sood MM, Levin A: The cost of starting and  
5 2 maintaining a large home hemodialysis program. *Kidney Int*, 77: 1039-1045, 2010  
6  
7 3 11. Mowatt G, Vale L, Perez J, Wyness L, Fraser C, MacLeod A, Daly C, Stearns SC: Systematic  
8 4 review of the effectiveness and cost-effectiveness, and economic evaluation, of home  
9 5 versus hospital or satellite unit haemodialysis for people with end-stage renal failure.  
10 6 *Health technology assessment*, 7: 1-174, 2003  
11  
12 7 12. Baboolal K, McEwan P, Sondhi S, Spiewanowski P, Wechowski J, Wilson K: The cost of renal  
13 8 dialysis in a UK setting--a multicentre study. *Nephrol Dial Transplant*, 23: 1982-1989,  
14 9 2008  
15  
16 10 13. Agar JW, Knight RJ, Simmonds RE, Boddington JM, Waldron CM, Somerville CA: Nocturnal  
17 11 haemodialysis: an Australian cost comparison with conventional satellite haemodialysis.  
18 12 *Nephrology*, 10: 557-570, 2005  
19  
20 13 14. Mohr PE, Neumann PJ, Franco SJ, Marainen J, Lockridge R, Ting G: The case for daily dialysis:  
21 14 its impact on costs and quality of life. *Am J Kidney Dis*, 37: 777-789, 2001  
22  
23 15 15. Pauly RP, Komenda P, Chan CT, Copland M, Gangji A, Hirsch D, Lindsay R, MacKinnon M,  
24 16 MacRae JM, McFarlane P, Nesrallah G, Pierratos A, Plaisance M, Reintjes F, Rioux J-P,  
25 17 Shik J, Steele A, Stryker R, Wu G, Zimmerman DL: Programmatic variation in home  
26 18 hemodialysis in Canada: results from a nationwide survey of practice patterns. *Canadian*  
27 19 *Journal of Kidney Health and Disease*, 1: 11, 2014  
28  
29 20 16. Agar JW: Conserving water in and applying solar power to haemodialysis: 'green dialysis'  
30 21 through wiser resource utilization. *Nephrology*, 15: 448-453, 2010  
31  
32  
33  
34  
35  
36  
37  
38  
39  
40  
41  
42  
43  
44  
45  
46  
47  
48  
49  
50  
51  
52  
53  
54  
55  
56  
57  
58  
59  
60

**Table 1** – Water and electricity consumption and cost per treatment for various combinations of treatment duration and dialysate flows (not including cost of intermittent chemical disinfection)

| Duration and Qd   | Water                               |                                                  |                                       |                            | Electricity                                              |                                   | Total cost per treatment |
|-------------------|-------------------------------------|--------------------------------------------------|---------------------------------------|----------------------------|----------------------------------------------------------|-----------------------------------|--------------------------|
|                   | Per treatment dialysate desired (L) | Per treatment water consumption (L, 20 °C, n=5)* | % Dialysate desired to water consumed | Per treatment water cost** | Per treatment electricity consumption (kWh, 20 °C, n=5)* | Per treatment electricity cost*** |                          |
| 6 hr x 300 ml/min | 108                                 | 805.2 ± 39.0                                     | 13%                                   | \$2.61                     | 4.25 ± 0.46                                              | \$0.38                            | <b>\$2.99</b>            |
| 8 hr x 300 ml/min | 144                                 | 1012.8 ± 47.8                                    | 14%                                   | \$3.29                     | 5.16 ± 0.48                                              | \$0.46                            | <b>\$3.74</b>            |
| 4 hr x 500 ml/min | 120                                 | 667.5 ± 32.8                                     | 18%                                   | \$2.17                     | 3.68 ± 0.22                                              | \$0.33                            | <b>\$2.49</b>            |
| 6 hr x 500 ml/min | 180                                 | 898.7 ± 21.6                                     | 20%                                   | \$2.92                     | 4.70 ± 0.28                                              | \$0.42                            | <b>\$3.33</b>            |
| 2 hr x 800 ml/min | 96                                  | 482.9 ± 16.8                                     | 20%                                   | \$1.57                     | 2.64 ± 0.23                                              | \$0.23                            | <b>\$1.80</b>            |
| 3 hr x 800 ml/min | 144                                 | 604.7 ± 28.8                                     | 24%                                   | \$1.96                     | 3.40 ± 0.26                                              | \$0.30                            | <b>\$2.26</b>            |
| 4 hr x 800 ml/min | 192                                 | 734.4 ± 24.4                                     | 26%                                   | \$2.38                     | 4.04 ± 0.38                                              | \$0.36                            | <b>\$2.74</b>            |

\* Mean

\*\* Assuming water cost of \$3.2438 per m<sup>3</sup> and includes a 60 min pre-treatment machine warm-up and operations check plus a 45 min post-treatment heat disinfection cycle

\*\*\* Assuming electricity cost of \$0.089 per kWh and includes a 60 min pre-treatment machine warm-up and operations check plus a 45 min post-treatment heat disinfection cycle

**Table 2** – Monthly and annualized water and electricity costs associated with HHD for common HHD prescriptions (including treatment and routine chemical disinfection protocols\*)

| Prescription               | Monthly water costs | Annual water costs | Monthly electricity cost | Annual electricity cost | Total annual cost |
|----------------------------|---------------------|--------------------|--------------------------|-------------------------|-------------------|
| 4 hr x 500 ml/min x 3/wk   | \$30.63             | \$367.56           | \$4.55                   | \$54.56                 | <b>\$422.12</b>   |
| 2 hr x 800 ml/min x 6/wk   | \$45.91             | \$550.87           | \$6.72                   | \$80.59                 | <b>\$631.47</b>   |
| 8 hr x 300 ml/min x 3.5/wk | \$51.99             | \$623.87           | \$7.21                   | \$86.48                 | <b>\$710.35</b>   |
| 8 hr x 300 ml/min x 6/wk   | \$92.35             | \$1108.15          | \$12.93                  | \$155.11                | <b>\$1263.27</b>  |

\* Based on a 31-day month and a chemical disinfection performed after every third HD treatment and once weekly for the RO machine
